# Supplementary material for: Persistency of Prediction Accuracy and Genetic Gain in Synthetic Populations Under Recurrent Genomic Selection
Source: PubMed Central journal article supplement (PMC5345710; doi:10.1534/g3.116.036582), 2017-01-04
Supplement: 801FigureS1.pdf [file 801FigureS1.pdf]

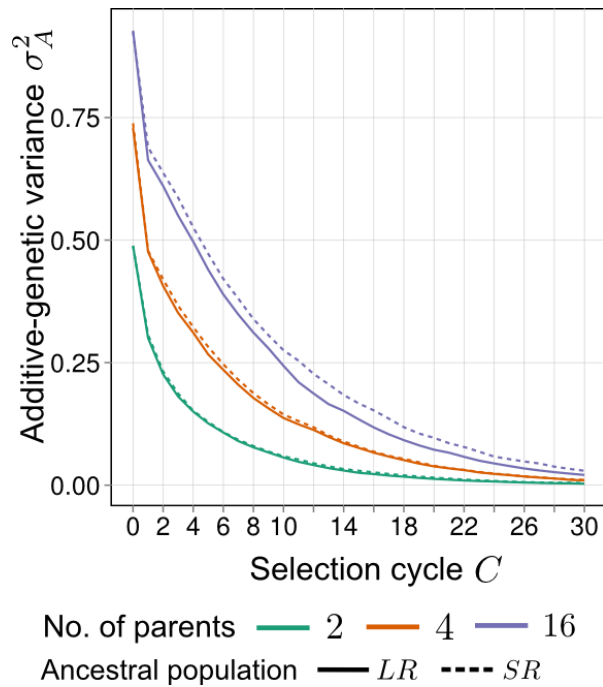

**Figure S1** Additive genetic variance  $\sigma_A^2$  in scenario  $Re-LD_A-SNP$  under recurrent genomic selection across  $C = 0, 1, \dots, 30$  selection cycles for synthetics produced from  $N_p = 2, 4, 16$  parents taken from ancestral populations  $SR$  or  $LR$ . Values in are expressed in units of  $\sigma_A^2(anc)$ , respectively.
