# Supplementary material for: Persistency of Prediction Accuracy and Genetic Gain in Synthetic Populations Under Recurrent Genomic Selection
Source: PubMed Central journal article supplement (PMC5345710; doi:10.1534/g3.116.036582), 2017-01-04
Supplement: 801FigureS3.pdf [file 801FigureS3.pdf]

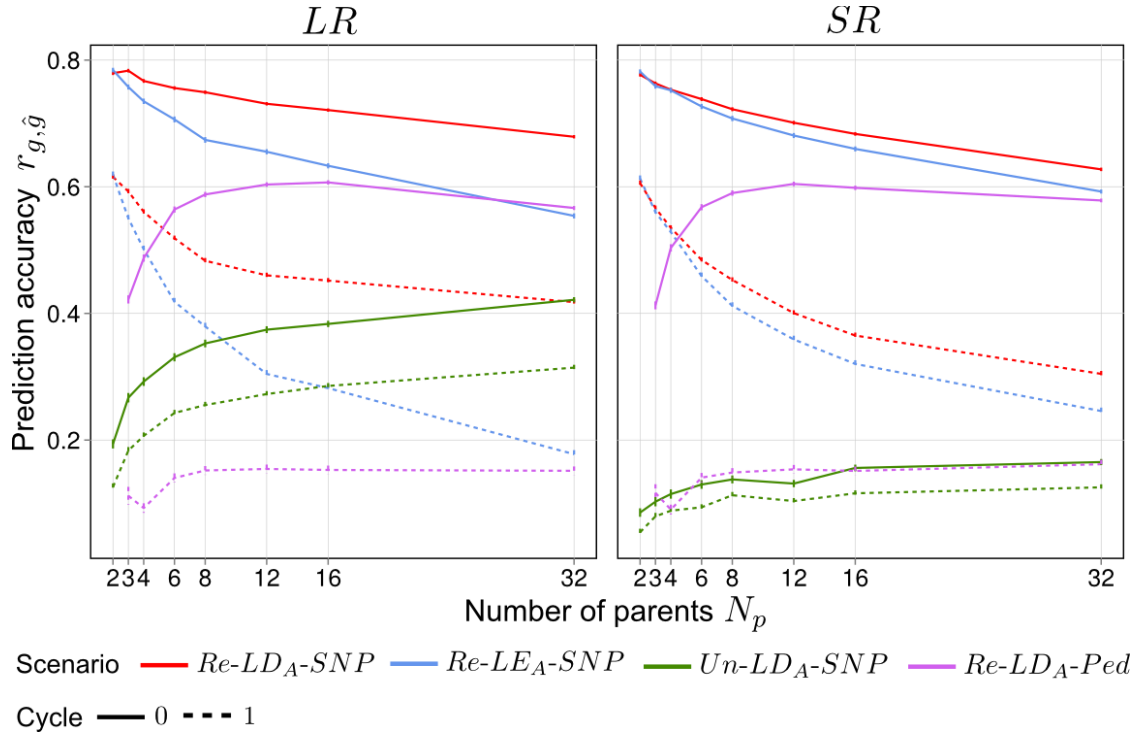

**Figure S3** Average prediction accuracy  $r_{g,\hat{g}}$  in selection cycles  $C = 0$  and  $C = 1$  for synthetics produced from different numbers of parents  $N_p$  taken from ancestral populations *SR* and *LR*.
