# Supplementary material for: Persistency of Prediction Accuracy and Genetic Gain in Synthetic Populations Under Recurrent Genomic Selection
Source: PubMed Central journal article supplement (PMC5345710; doi:10.1534/g3.116.036582), 2017-01-04
Supplement: 801FigureS4.pdf [file 801FigureS4.pdf]

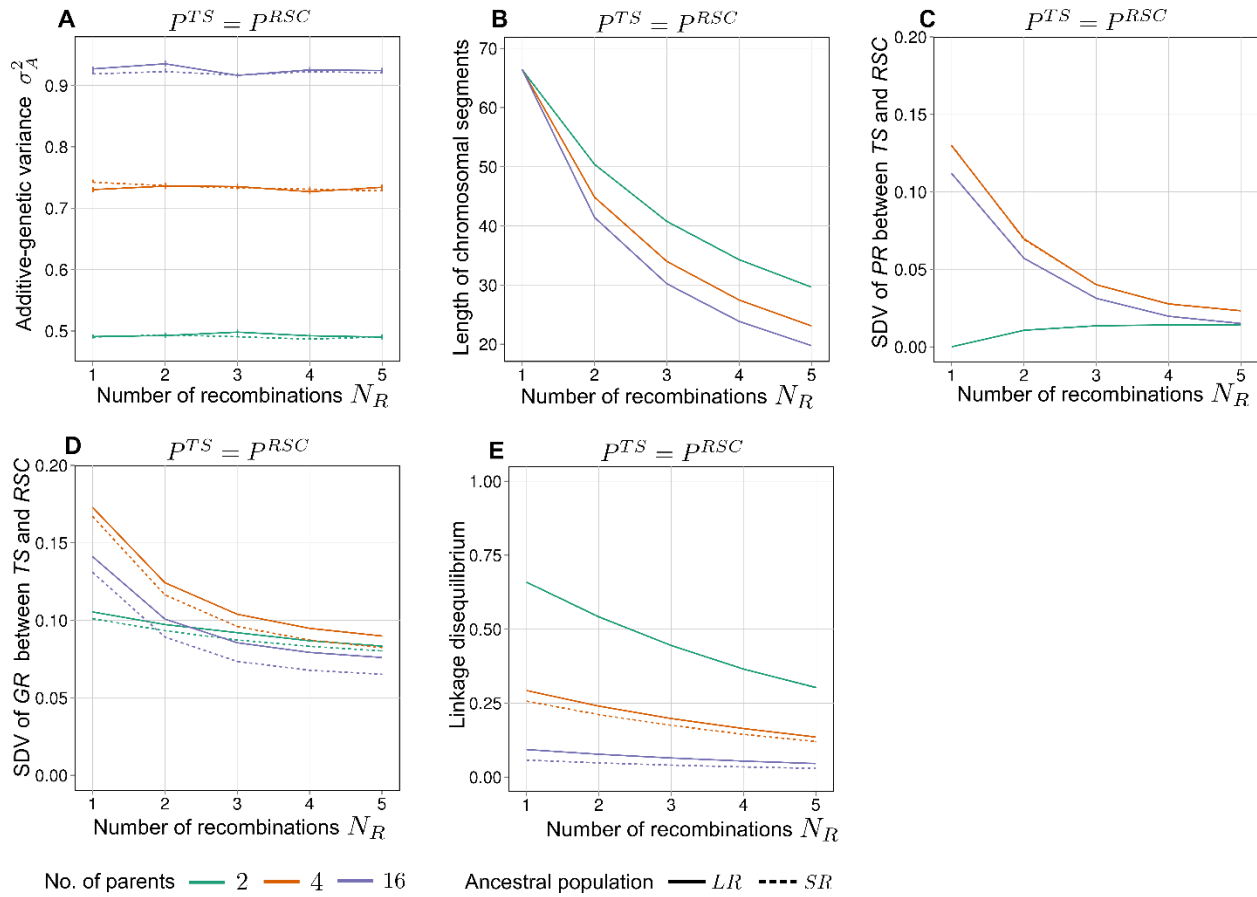

**Figure S4** (A) Average additive genetic variance  $\sigma_A^2$ , (B) average length of chromosomal segments of parental origin, (C) average standard deviation (SDV) of pedigree relationships (PR) between TS and RSC, (D) average standard deviation of genomic relationships (GR) between TS and RSC, (E) average linkage disequilibrium in selection cycles  $C = 0$  for synthetics produced from  $N_p = 2, 4, 16$  parents taken from ancestral populations SR or LR. Values in (A) are expressed in units of  $\sigma_A^2(anc)$ . Values in (E) refer to QTL-SNP pairs with a genetic distance between 10 and 11 cM. All results refer to averages of scenarios with  $p^{TS} = p^{RSC}$ , because expected values were identical.
