# Supplementary material for: Persistency of Prediction Accuracy and Genetic Gain in Synthetic Populations Under Recurrent Genomic Selection
Source: PubMed Central journal article supplement (PMC5345710; doi:10.1534/g3.116.036582), 2017-01-04
Supplement: 801FigureS6.pdf [file 801FigureS6.pdf]

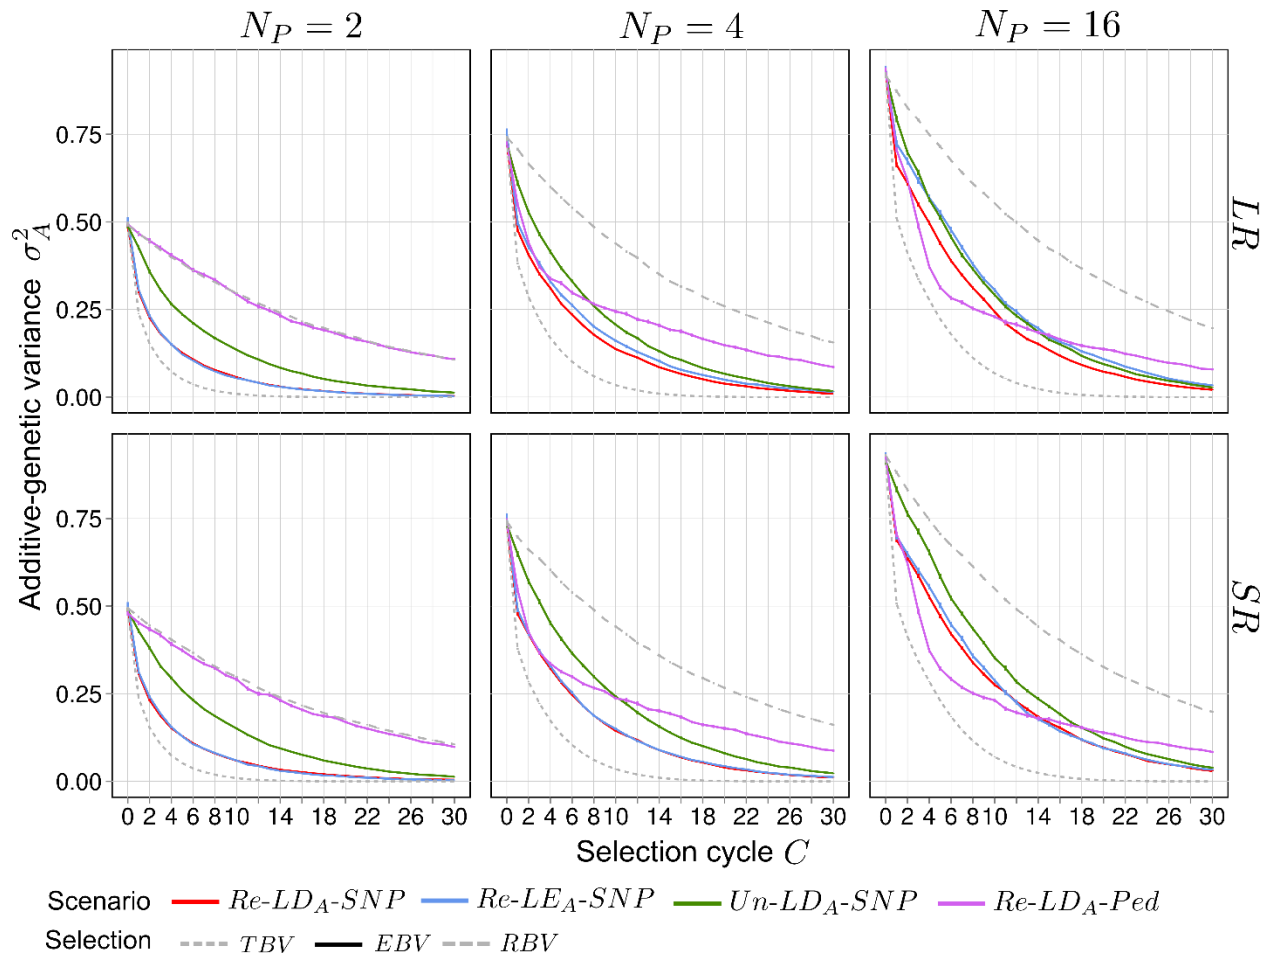

**Figure S6** Average additive genetic variance  $\sigma_A^2$  under recurrent genomic selection across selection cycle  $C = 0, 1, \dots, 30$  for synthetics produced from  $N_p = 2, 4, 16$  parents taken from ancestral populations *SR* and *LR*. Selection of candidates was based on either true breeding values (*TBV*), random breeding values (*RBV*) or estimated breeding values (*EBV*) under different information scenarios. Values in are expressed in units of  $\sigma_A^2(anc)$ . Because  $\sigma_A^2$  has identical expected values across scenarios for selection based on *TBV* and *RBV*, the means across scenarios are shown.
