# Supplementary material for: Persistency of Prediction Accuracy and Genetic Gain in Synthetic Populations Under Recurrent Genomic Selection
Source: PubMed Central journal article supplement (PMC5345710; doi:10.1534/g3.116.036582), 2017-01-04
Supplement: 801FigureS7.pdf [file 801FigureS7.pdf]

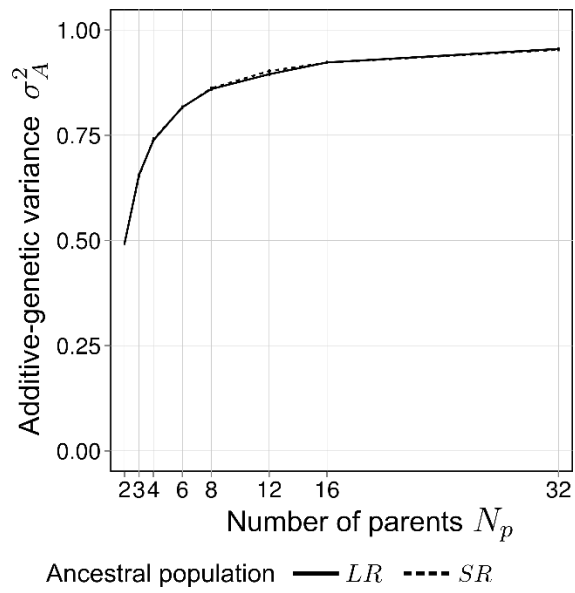

**Figure S7** Additive genetic variance  $\sigma_A^2$  in selection cycle  $C = 0$  for synthetics produced from different numbers of parents  $N_p$  taken from ancestral populations *SR* and *LR*. Values are expressed in units of  $\sigma_A^2(anc)$ .
