# Supplementary material for: Persistency of Prediction Accuracy and Genetic Gain in Synthetic Populations Under Recurrent Genomic Selection
Source: PubMed Central journal article supplement (PMC5345710; doi:10.1534/g3.116.036582), 2017-01-04
Supplement: 801FigureS8.pdf [file 801FigureS8.pdf]

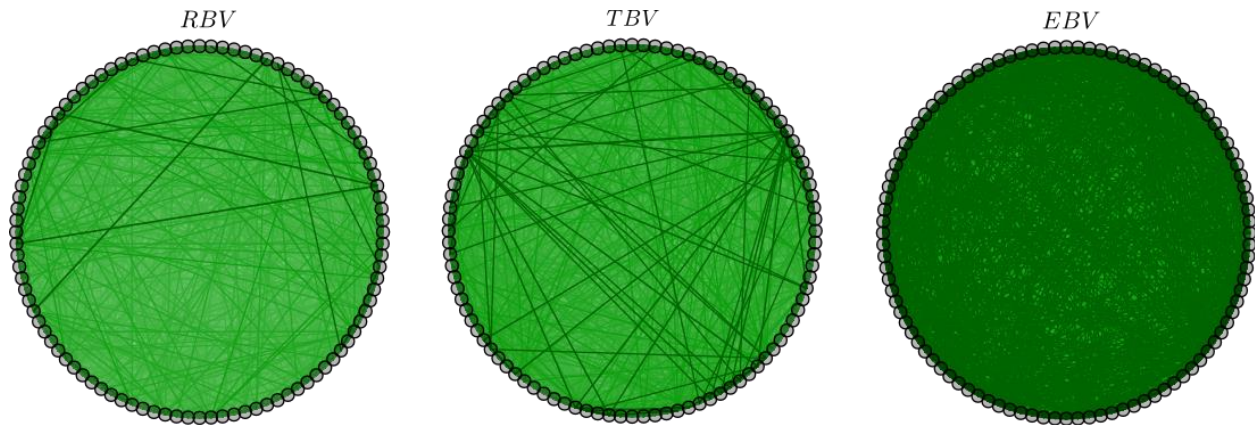

**Figure S8** Visualization of additive relationships (*AR*) among 100 selection candidates after a single round of selection either based on random breeding values (*RBV*), estimated breeding values (*EBV*) or true breeding values (*TBV*) for scenario *Re-LD<sub>A</sub>-Ped* and for number of parents  $N_p = 4$ . The strength of the *AR* is represented by the thickness of the lines connecting selection candidates. The figure was computed using the *R*-package *qgraph* based on a single representative simulation run.
