# Supplementary material for: Persistency of Prediction Accuracy and Genetic Gain in Synthetic Populations Under Recurrent Genomic Selection
Source: PubMed Central journal article supplement (PMC5345710; doi:10.1534/g3.116.036582), 2017-01-04
Supplement: 801TableS1.pdf [file 801TableS1.pdf]

**Table S1** Characterization of the four scenarios analyzed in this study to assess the contributions of (i) pedigree relationships among individuals in the training set ( $TS$ ) and recurrent selection candidates ( $RSC$ ) captured by SNPs, (ii) co-segregation of QTL and SNPs, and (iii) ancestral linkage disequilibrium ( $LD_A$ ) between QTL and SNPs to persistency of prediction accuracy  $r_{g,\hat{g}}$  and cumulative genetic gain  $\sum \Delta G$  in synthetics. Note that pairs of SNP markers and pairs of QTL were always allowed to be in  $LD_A$ .

| Scenario      | TS and RSC are                                     | QTL and SNPs in | Relationship matrix calculated from | Type       |
|---------------|----------------------------------------------------|-----------------|-------------------------------------|------------|
| $Re-LD_A-SNP$ | Related<br>( $P_{TS} = P_{RSC}$ )                  | $LD_A$          | SNPs                                | Realistic  |
| $Re-LD_A-Ped$ |                                                    | $LD_A$          | Pedigree records                    | Realistic  |
| $Re-LE_A-SNP$ |                                                    | $LE_A$          | SNPs                                | Artificial |
|               |                                                    |                 |                                     |            |
| $Un-LD_A-SNP$ | Unrelated<br>( $P_{TS} \cap P_{RSC} = \emptyset$ ) | $LD_A$          | SNPs                                | Realistic  |
